# Supplementary material for: Identification and verification of ferroptosis-related core gene in postmenopausal osteoporosis based on bioinformatics analysis
Source: PeerJ journal article supplement (doi:10.7717/peerj.20666), 2026-03-31

**Degree**

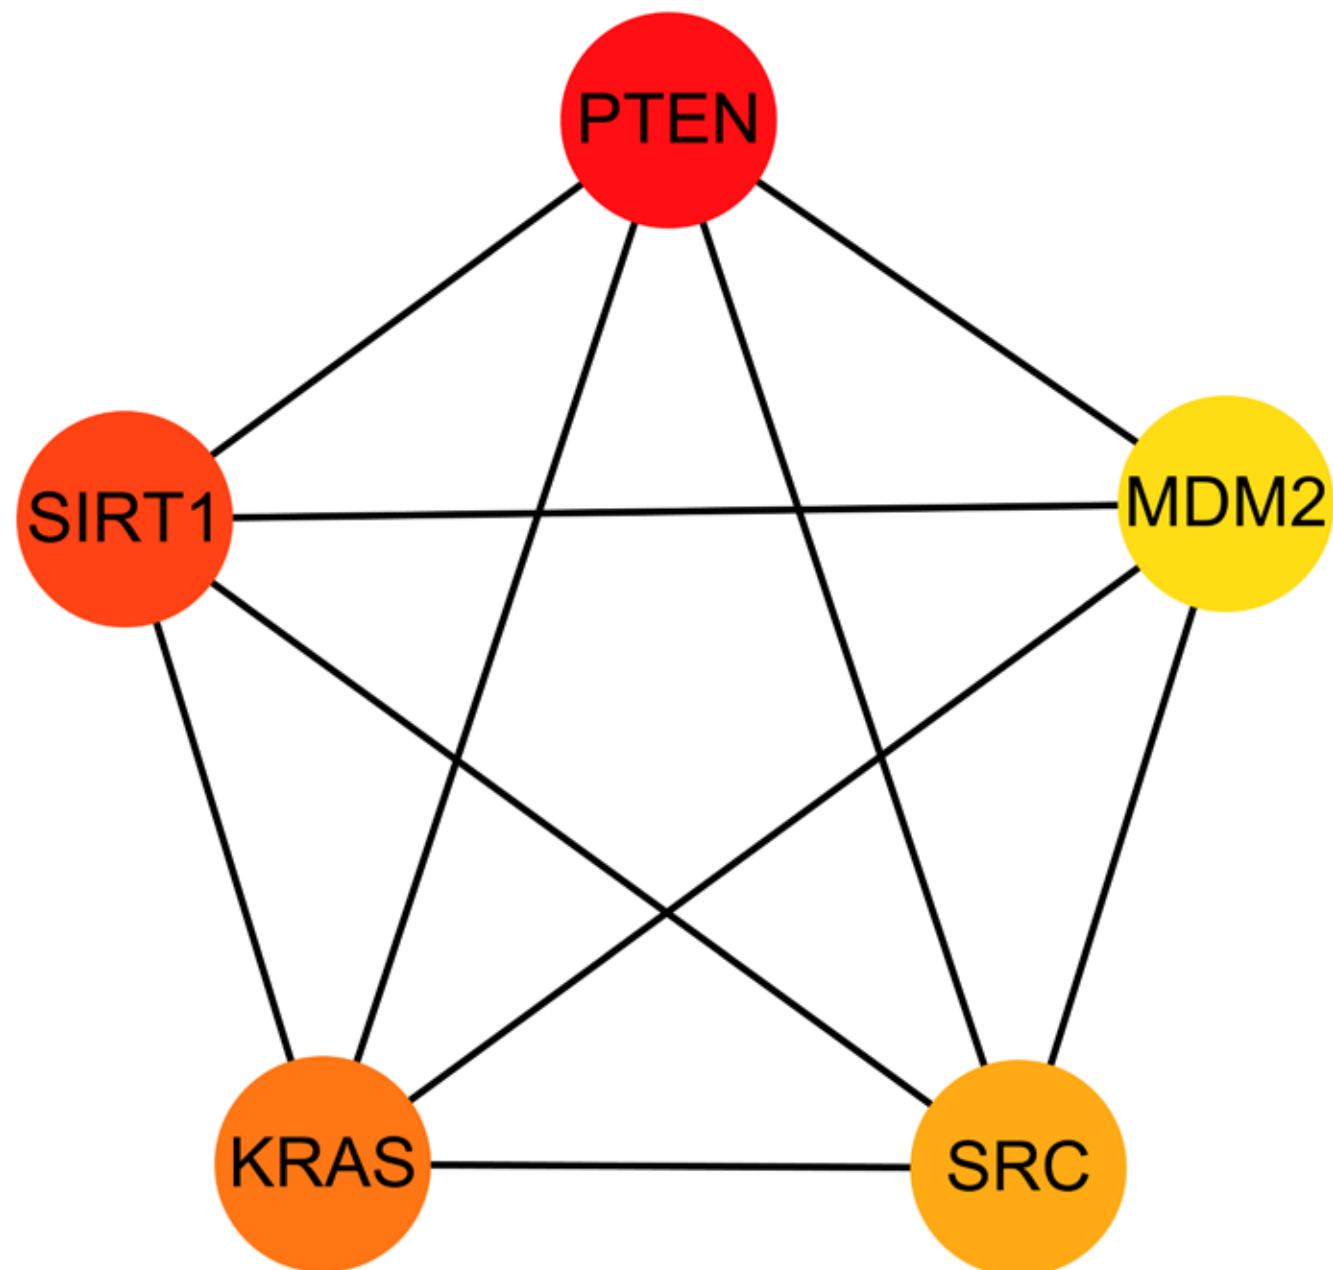

**BottleNeck**

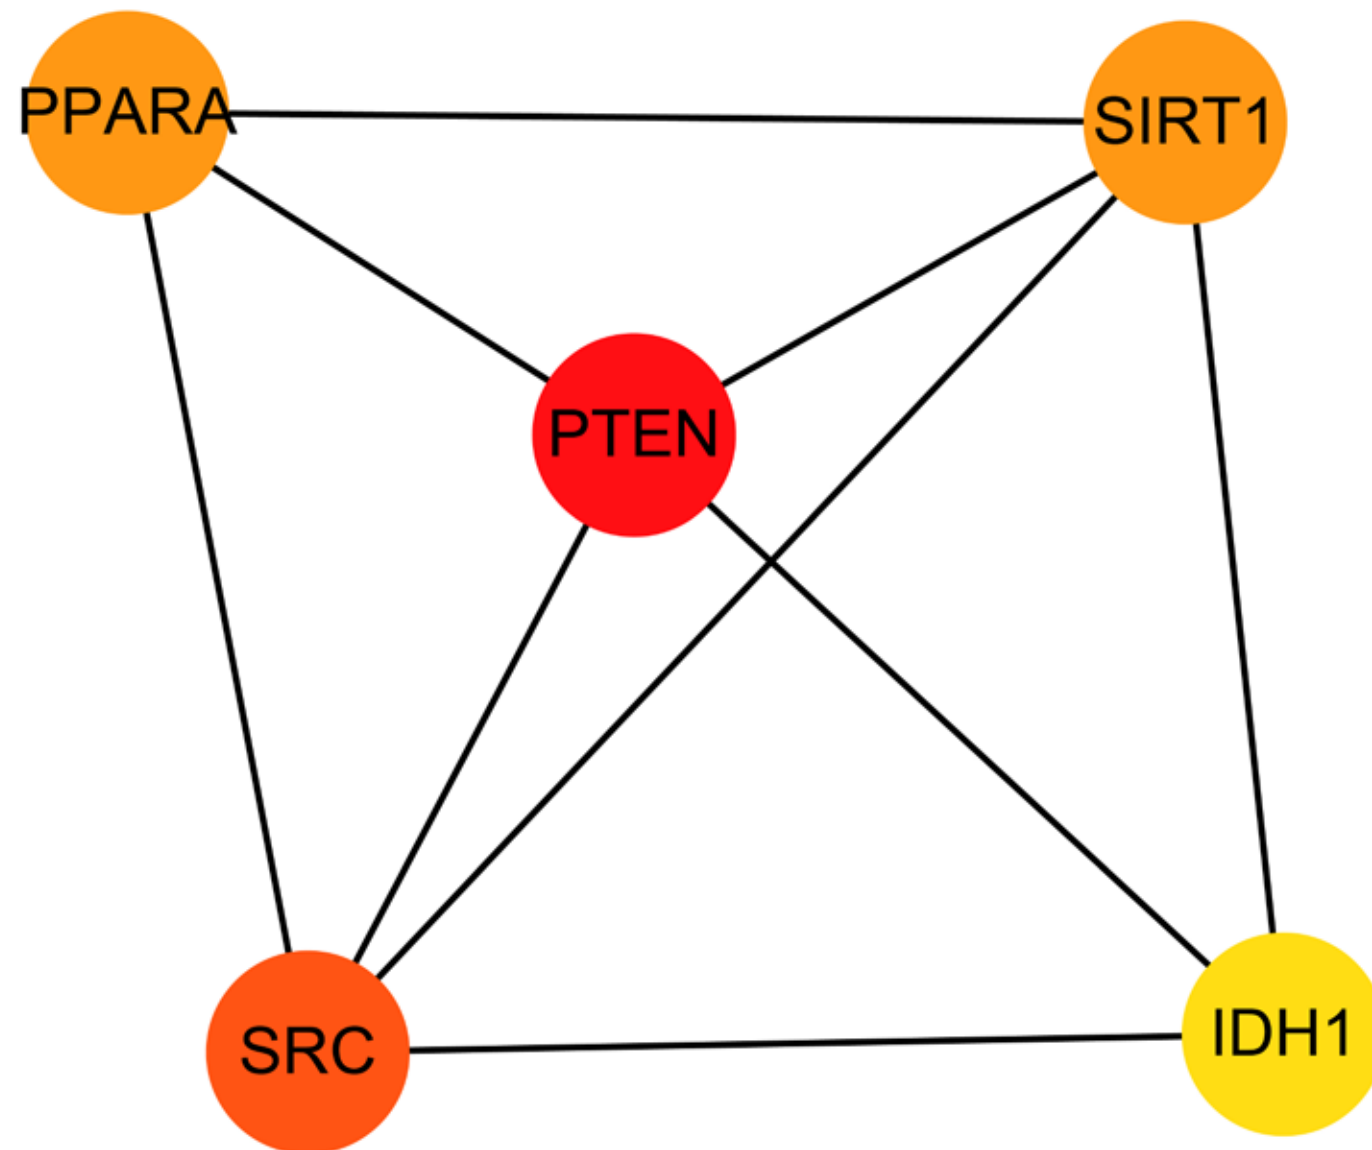

**EcCentricity**

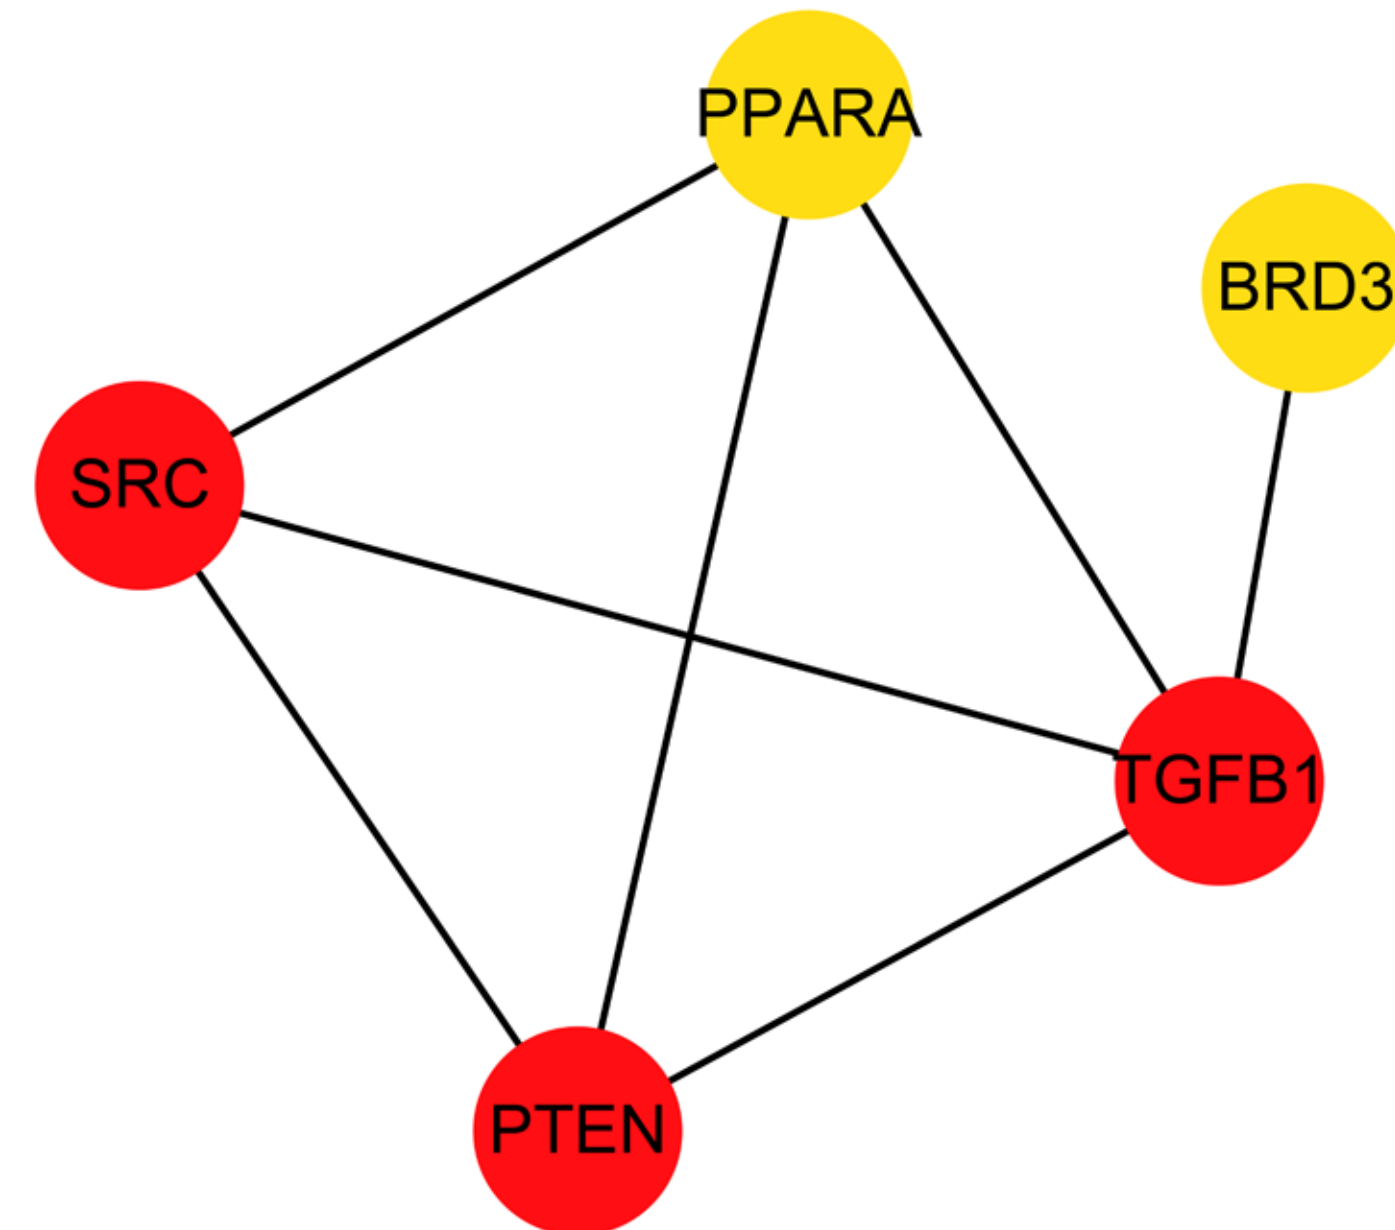

**MCC**

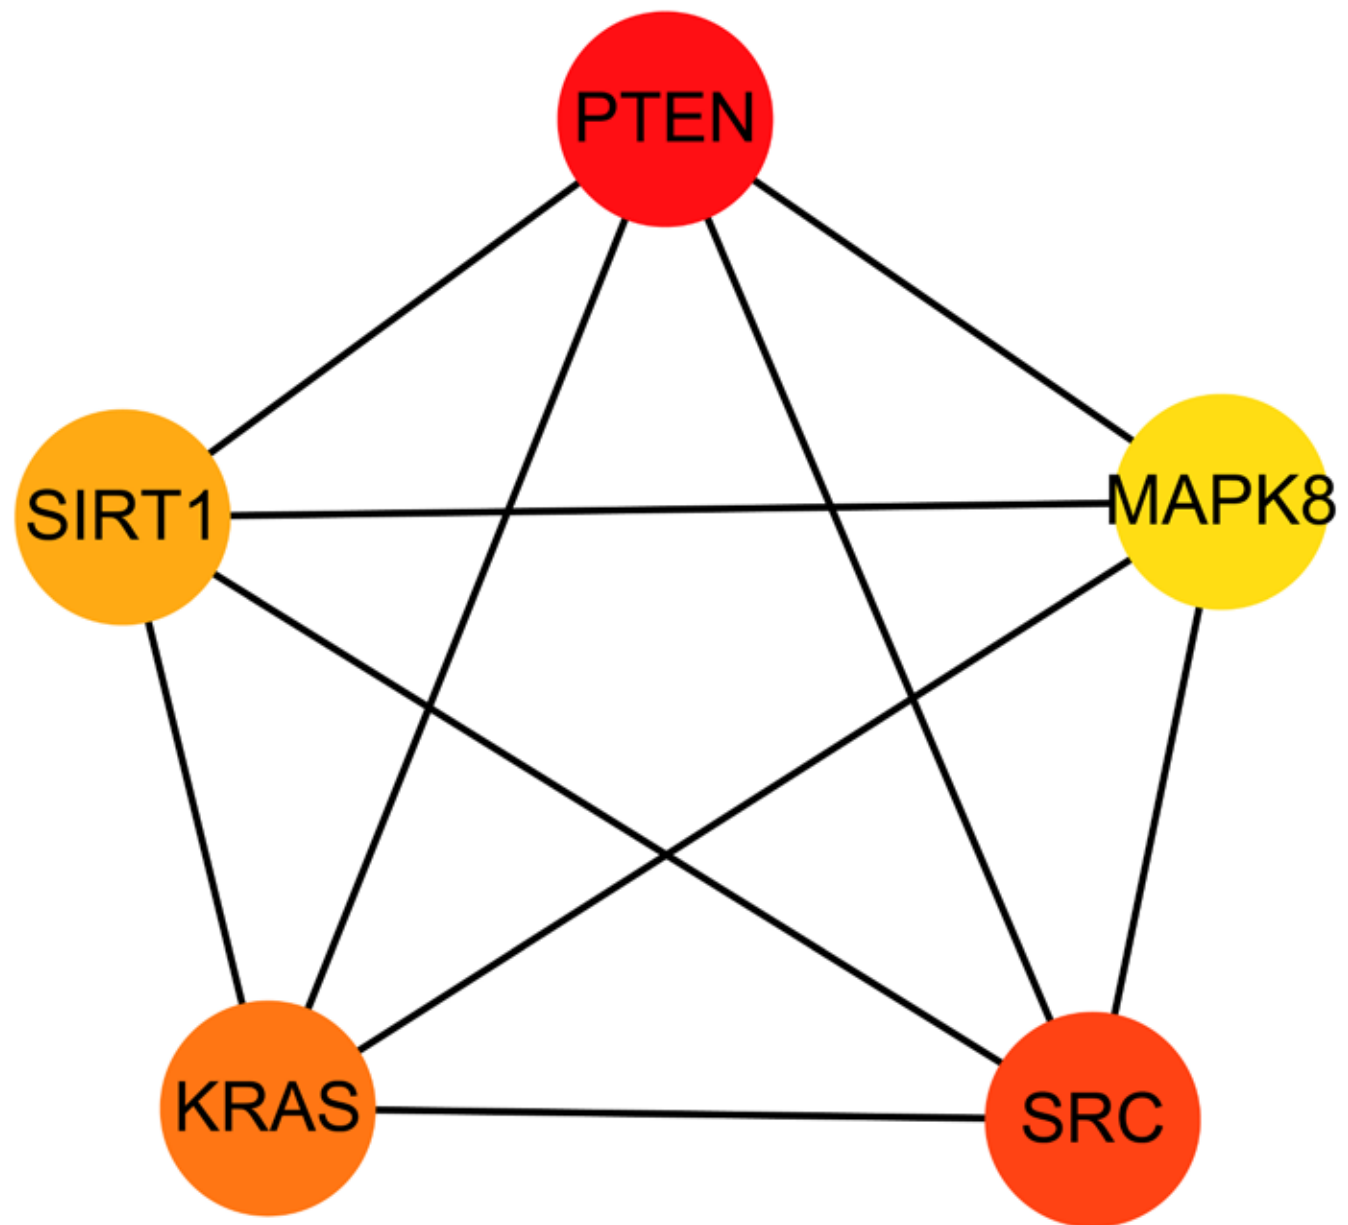

**MNC**

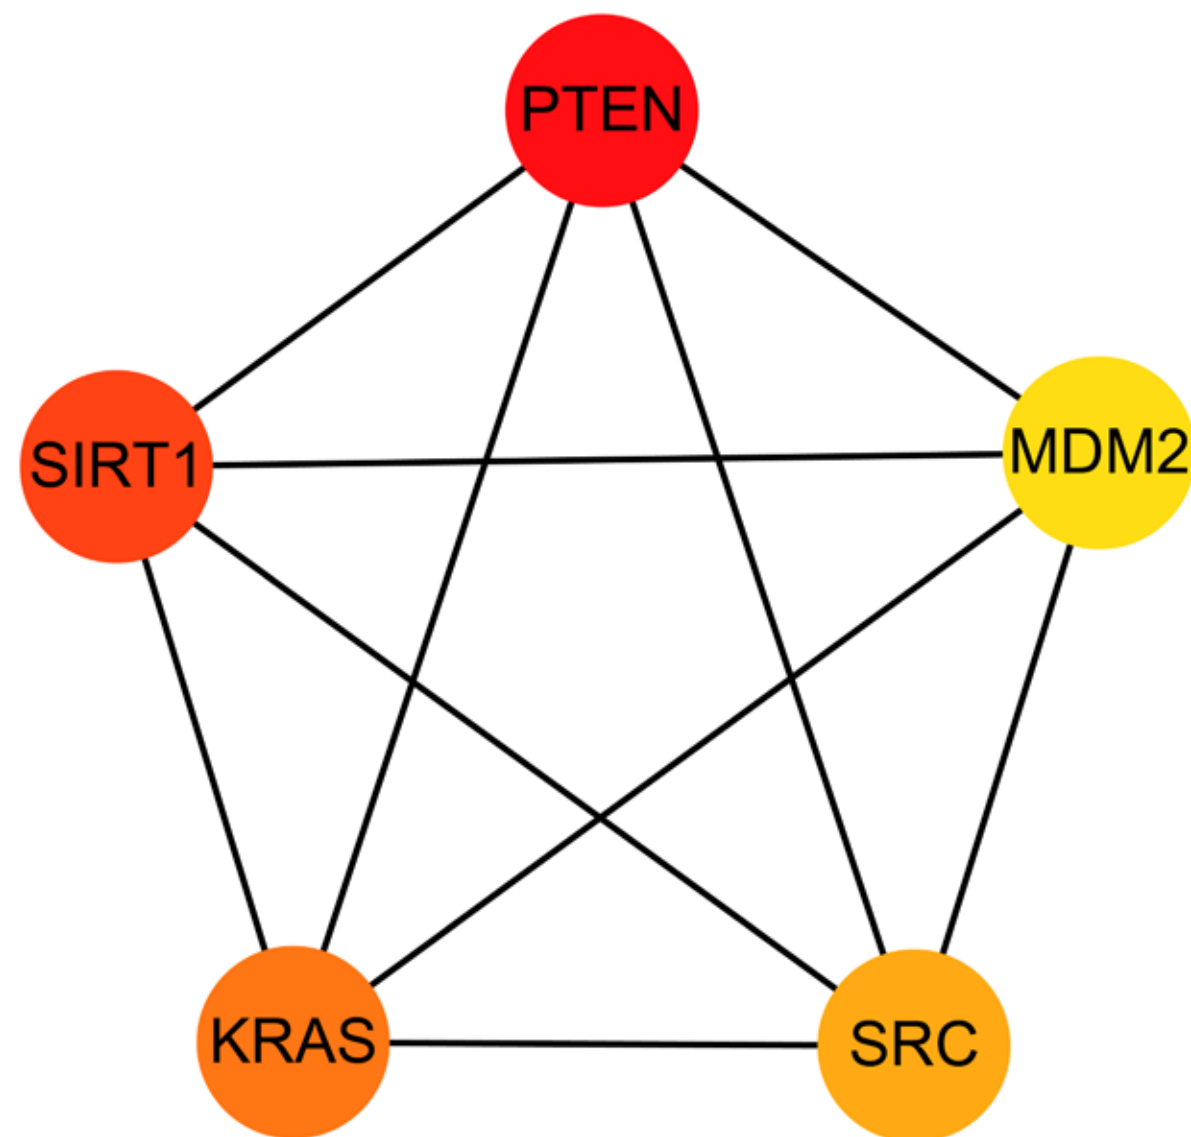

**Stress**

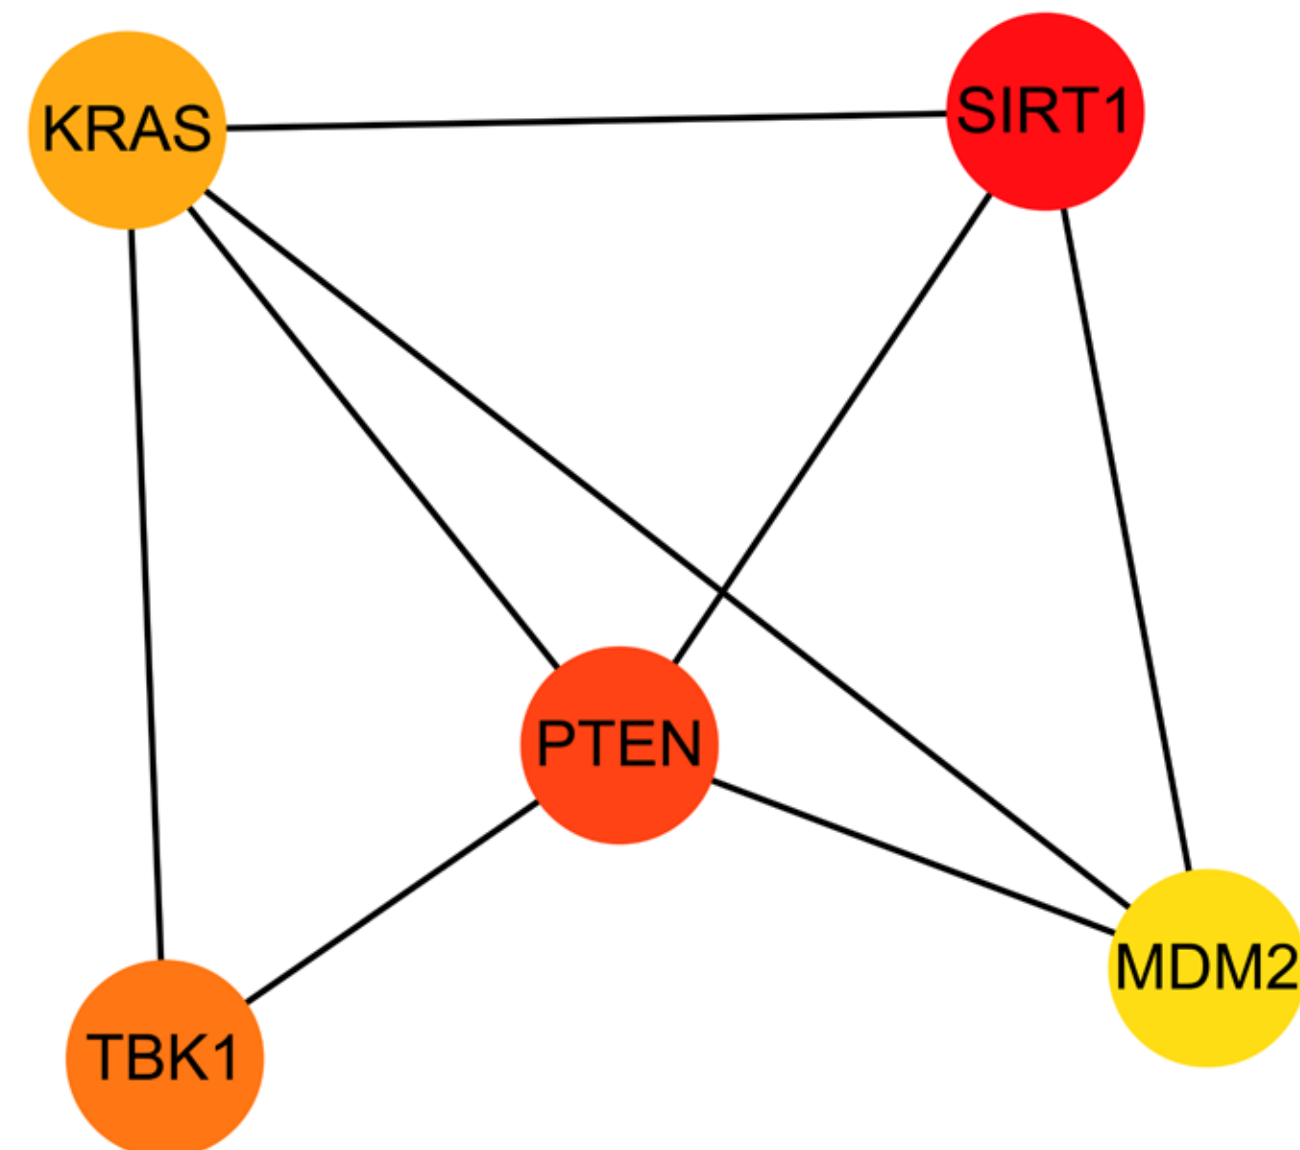

Supplement: Supplementary_Figure_S1.pdf [file Supplementary_Figure_S1.pdf]
